# Supplementary material for: The Relationship between the Antitumor Effect of the IL-12 Gene Therapy and the Expression of Th1 Cytokines in an HPV16-Positive Murine Tumor Model
Source: Hindawi journal article supplement (doi:10.1155/2014/510846), 2014-01-01
Supplement: f1 [file 510846.f1.pdf]

Detection of cytokines in BMK-16/myc cell by RT-PCR

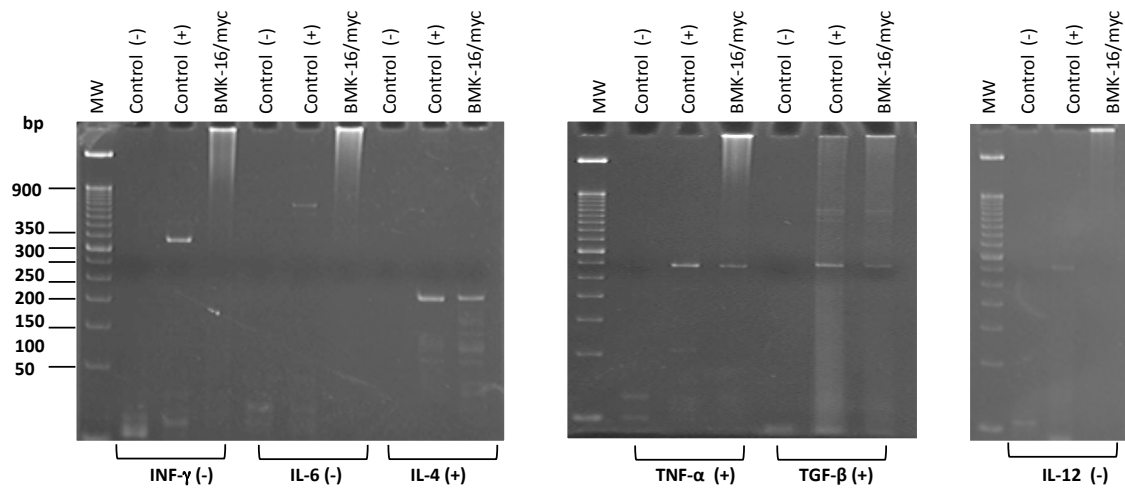

Supplementary material
